# Supplementary material for: Metabolic Comorbidities Modulate the Impact of Weight Loss on Liver Fibrosis in MASLD: A Real World Prospective Cohor Study
Source: Research Square preprint supplement (doi:10.21203/rs.3.rs-6314701/v1), 2025-08-21
Supplement: Supplementary file 1 [file 9f4490450306b85ec4132219.docx]

1 ***1.1 Study design***

2 Participants were recruited through online and printed advertisements. The in-person

3 follow up period was approximately one year.

4 ***1.2 Decision tree***

5 The decision tree is built using the rpart function in the “rpart” R package.

6 This study is intended to employ the decision tree learning algorithm, particularly the

7 classification and regression tree (CART), for the diagnosis of MASLD. Pruning of

8 the decision tree was performed with optimal complexity parameter (cp value) to

9 avoid overfitting. The tree was pruned with the cp function of the smallest tree within

10 one standard error of the best functioning tree—that is, the tree with the smallest

11 xerror, which was confirmed graphically (supplementary figure 1). Feature

12 importance for the decision tree was analysed using the Gini importance metric. In

13 this study, the trial-and-error procedure is employed to find the optimum maximum

14 depth of the tree. Internal validation of the decision tree was performed with the

15 whole data. Sensitivity, specificity, positive predictive value, negative predictive

16 value, positive likelihood ratio, negative likelihood ratio, and accuracy were

17 calculated.

18 ***1.3 linear mixed effect model***

19 R package nlme was used to implement linear mixed effect model. Subject effect was

20 included in the mixed model as a random effect, and time (baseline or 1 year) was

21 reffered as fixed effect. LFC difference between baseline and 1 year was examined.

22 We further conducted a series of subgroup analyses according to the mixed-effects

1 model. We reported the estimated marginal means and standard error of the model in

2 the different subgroups.

3 ***1.4 Multivariable linear regression model***

4 The ananlysis was conducted by the radiant.model package. Plot was generated using

5 the R package ggplot2. Linear regression intend s to predict a LFC using multiple

6 predictors. We used multiple linear regression to adjust for potential confounders (age,

7 sex, baseline weight, BMI and presence of Mets). Significant outliers were removed

8 from the analysis.

9 **Supplementary Figure Legends**

10 **Supplementary Figure 1:** visual representation between complexity parameter and the

11 mean error.

12 **Supplementary Figure 2:** The differences of histopathology results between Mets and no-

13 Mets.

14 Caption: Bar plot displayed the score of steatosis, inflammation, balloon, fibrosis and NAS

15 between Mets and no-Mets, * indicates P<0.05 between two comparisons.

16 **Supplementary Figure 3 abc:** The differences of MRI-PDFF results between Mets and

17 no-Mets.

18 Caption: Box plot displayed the liver fat content between Mets and no-Mets, * indicates

19 P<0.05 between two comparisons.

20 **Supplementary Figure 4:** Correlation matrix between the change of continuous variables.

21 Caption: The numbers above represent correlation coefficients, the diagonal displays a

22 histogram of frequency distributions, and below is a scatterplot (green highlighted the

23 significant correlations).

24 **Supplementary Figure 5:** The importance of Variables in the Decision tree 25

26

27

28

29

30

size of tree

| Supplementary Figure 1 |
| --- |

1 2 3 4 7 9 11 14 18 21 24


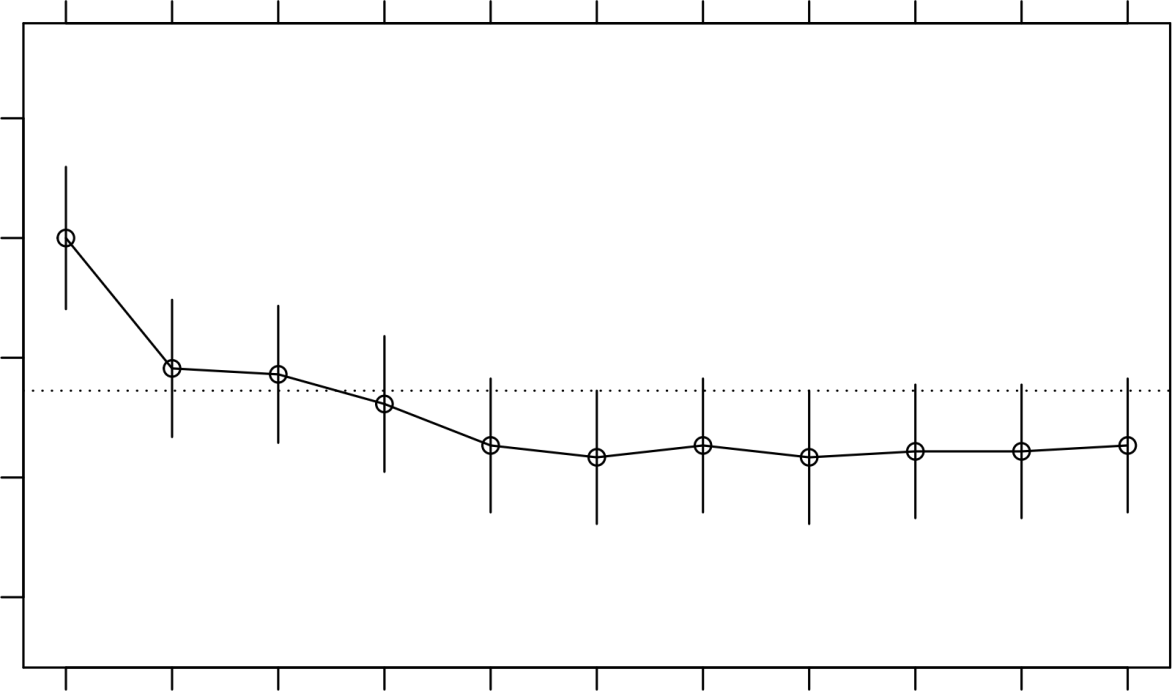


X−val Re lative Error

0 7 0 8 0 9 1 0 1.1

Inf 0.12 0.025 0.017 0.009 0.0029 0

cp

| Supplementary Figure 2 |
| --- |

**Histopathology Differences between Mets and no-Mets**

**5**

**4**

**3**

**Score**

**2**

**1**

**0**

**Steatosis**


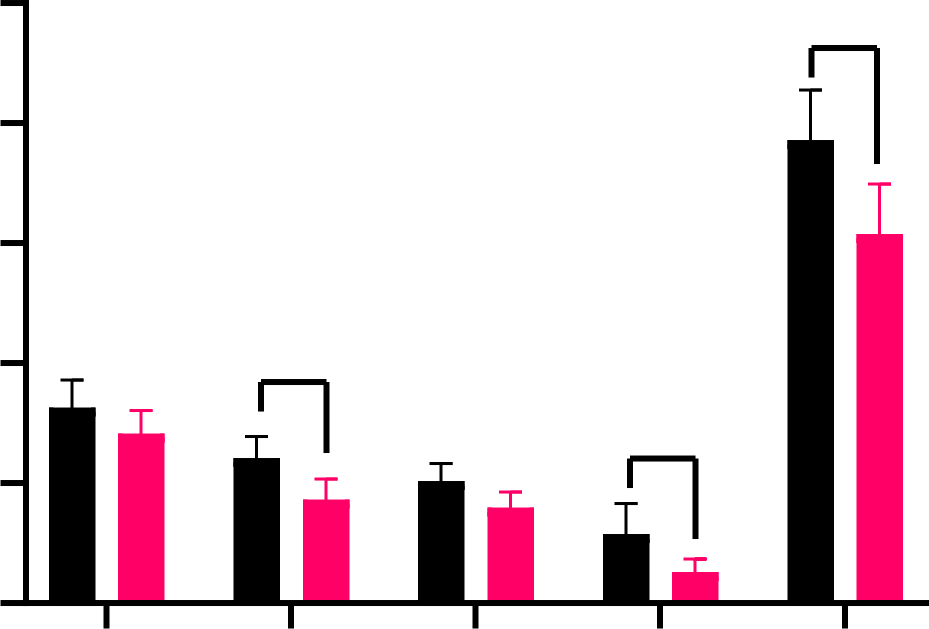
*

*

*

**Inflammation**

**Balloon**

**Fibrosis**

**NAS**


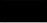
 Mets


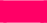
 no-Mets

| 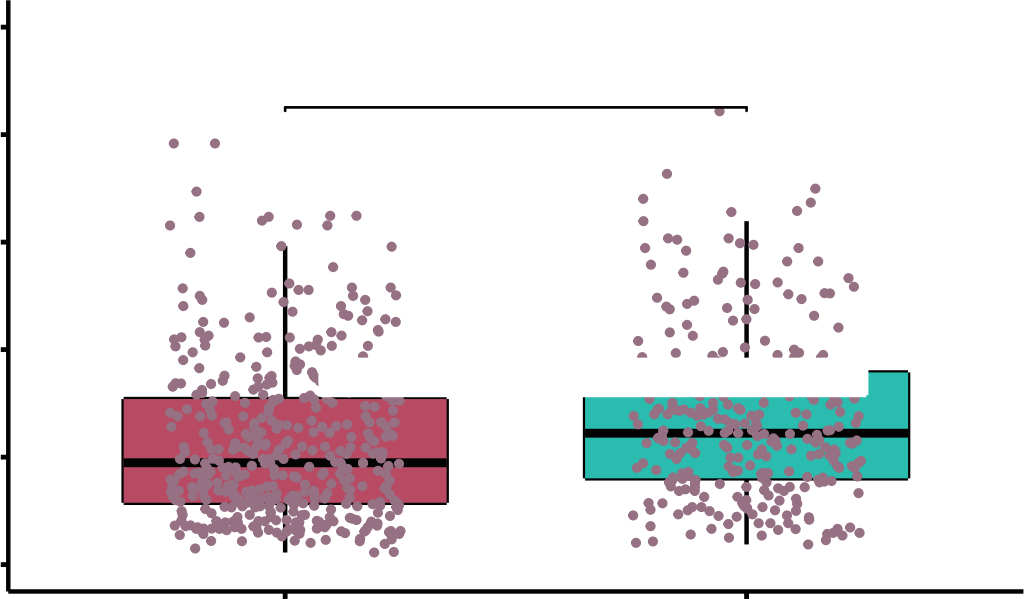Supplementary Figure 3  Liver Fat Content   | a | LFC in MASLD | | | --- | --- | --- | | 50  40  30  20  10  0 | * | | no Mets Mets | | Mets | | |
| --- | --- | --- | --- | --- | --- | --- | --- | --- |

| b  Liver Fat Content | 50  40  30  20  10  0 | LFC in overweight MASLD  * | | c  Liver Fat Content | LFC in obese MASLD | |
| --- | --- | --- | --- | --- | --- | --- |
| 50  40  30  20  10  0 | 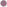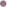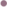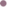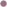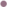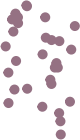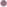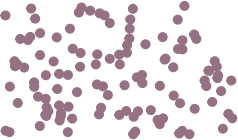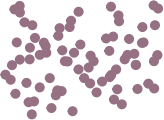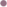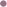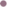   |  | | --- |  |  | | --- |   no Mets Mets 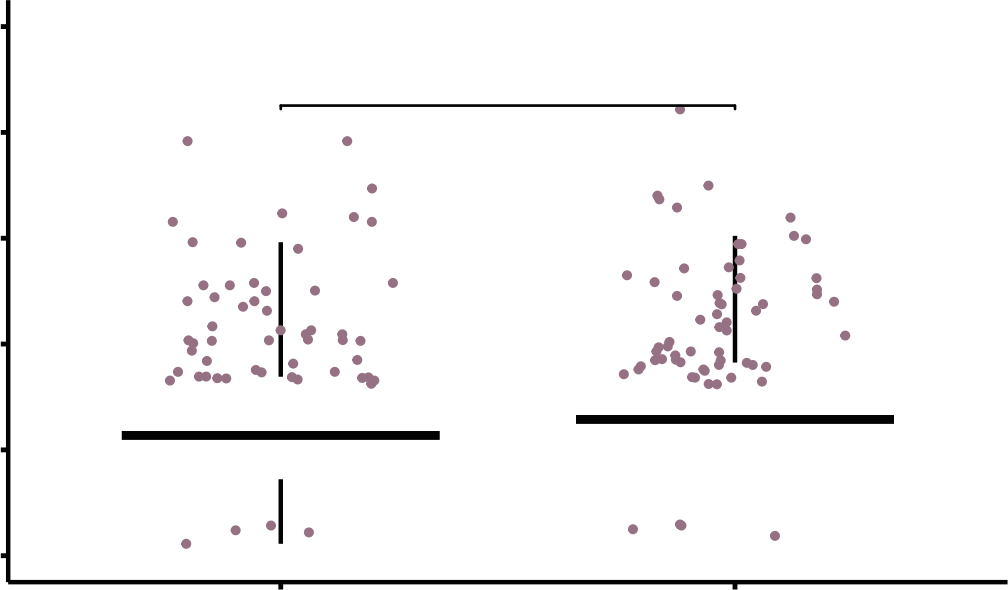 * |
| 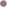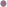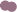  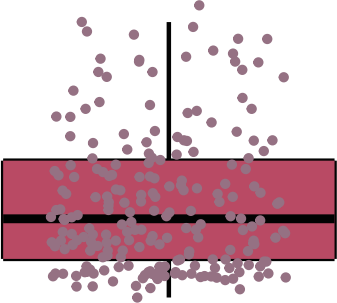 | 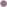  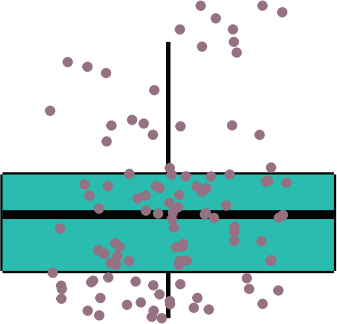 |
| no Mets Mets  Mets | | | |  |
| Mets | |
|  |  | |


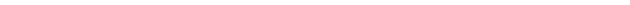
Supplementary Figure 4


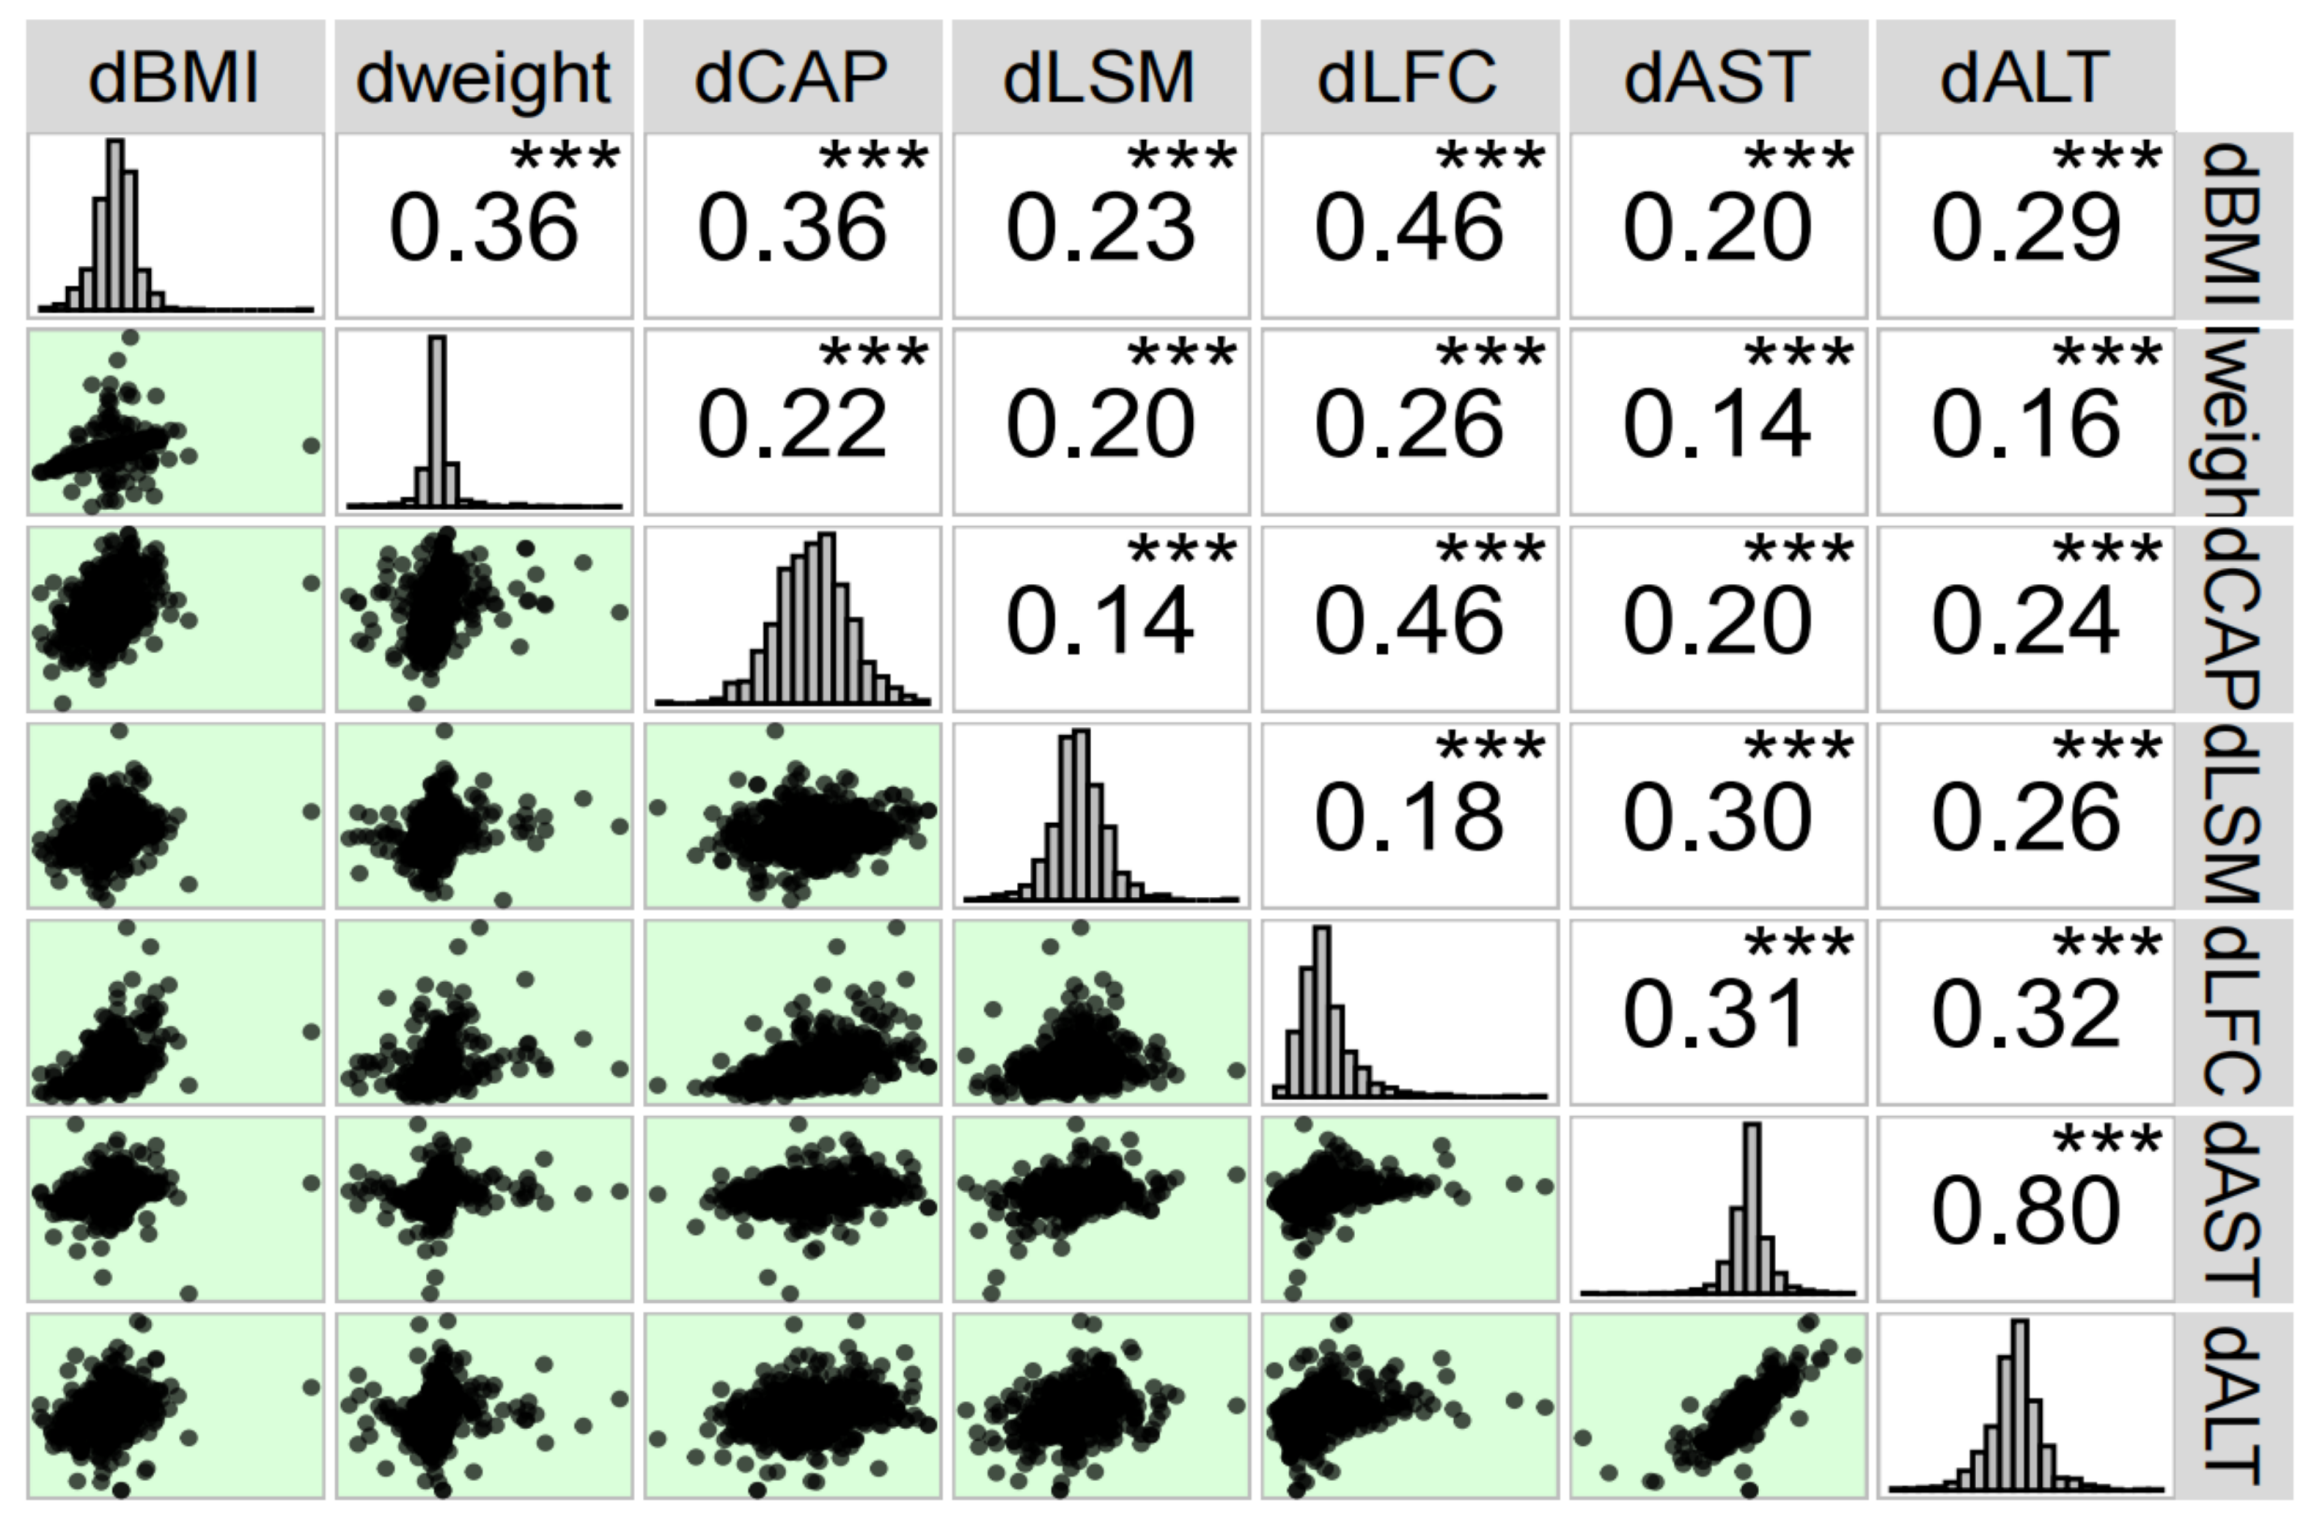


**Importance of Variables in Decision Tree**

| Supplementary Figure 5 |
| --- |


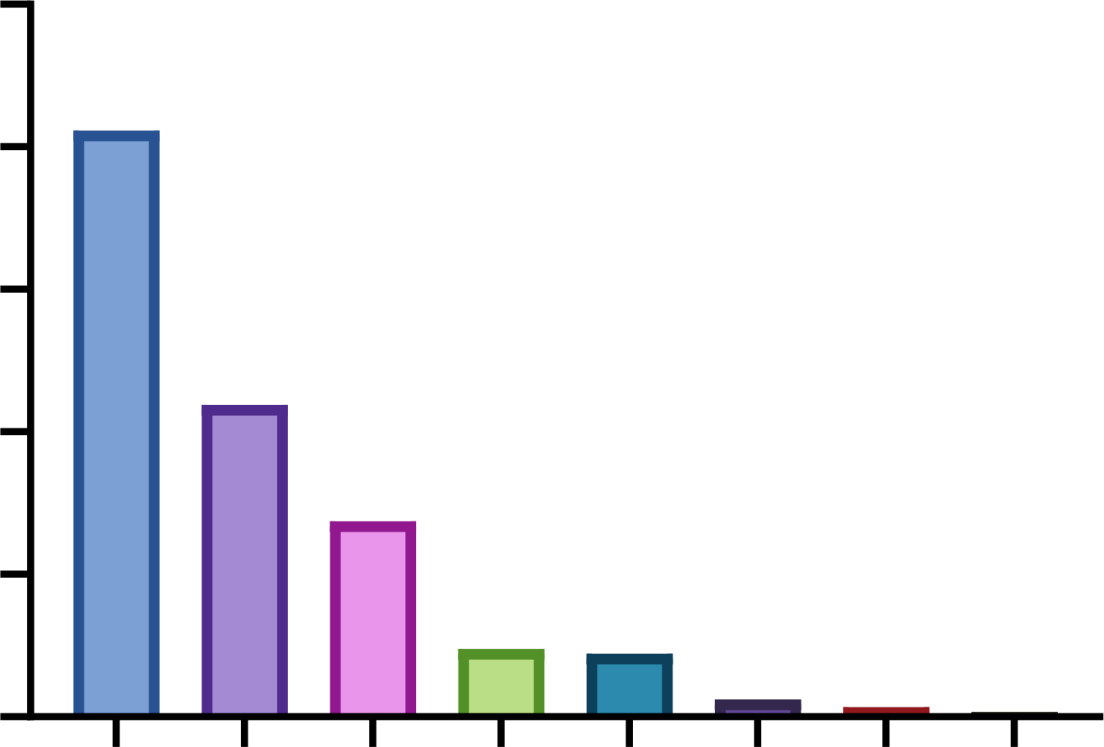
**50**

**40**

**Importance**

**30**

**20**

**10**

**0**

**BMI**

**CAP**

**Weight**

**AST**

**ALT**

**LSM**

**LDL**

**GGT**

**Relative change from baseline**

1 **supplementary tables**

Supplementary Table1 Baseline Characteristics by Histopathology Results

| Variables | no-NASH (n = 65) NASH (n = 81) | P |
| --- | --- | --- |
| Age,year | 46 (18) 39 (16) | 0.073 |
| Male, N(%) | 31 (48%) 50 (62%) | 0.1264 |
| Weight, kg | 80 (16.7) 81.4 (17.8) | 0.8873 |
| BMI, kg/m2 | 29.4 (3.7) 29.5 (5.5) | 0.5184 |
| Obesity, N(%) | 61 (94%) 74 (91%) | 0.8021 |
| Diabetes, N(%) | 12 (18%) 27 (33%) | 0.0672 |
| Mets, N(%)* | 19 (29%) 38 (47%) | 0.0449 |
| AC,cm | 97.3 (11.3) 97.3 (10.6) | 0.967 |
| WC,cm | 100.3 (9.5) 98.2 (8) | 0.1246 |
| HC,cm | 103.5 (9.3) 101.7 (9.4) | 0.1295 |
| SBP,mmHg | 130 (20) 129 (19) | 0.7571 |
| DBP,mmHg | 81 (16) 83 (13) Hematology Test Results | 0.1406 |
| AST, U/L* | 24.2 (12.5) 34.3 (24.9) | < 0.0001 |
| ALT, U/L* | 25.6 (21) 53 (43.4) | < 0.0001 |
| GGT, U/L* | 27.3 (31.5) 51.2 (52.9) | < 0.0001 |
| TB, umol/L* | 13 (7.5) 14.5 (7.2) | 0.0169 |
| TBA, umol/L | 2.6 (3.3) 2.8 (2.3) | 0.8316 |
| UA,umol/L* | 377 (136) 428 (169) | 0.0048 |
| TC, mmol/L | 5.16 (1.43) 5.3 (1.36) | 0.9247 |
| TG, mmol/L* | 1.5 (0.87) 2.07 (2.11) | 0.0005 |
| HDL, mmol/L* | 1.18 (0.32) 1.1 (0.2) | 0.004 |
| LDL, mmol/L | 3.23 (1.44) 3.28 (1.08) | 0.4555 |
| Glucose,mmol/L* | 5.26 (0.93) 5.8 (1.15) | 0.0002 |
| Ferritin,ug/L* | 124.5 (176.9) 242 (203) | < 0.0001 |
| Insulin,pmol/L* | 105.6 (110.83) 132.8 (96.8) | 0.0128 |
| HOMA-IR* | 3.87 (3.88) 4.99 (4.48) Imaging Results | 0.0014 |
| CAP, db/m* | 285 (50) 327 (49) | < 0.0001 |
| LSM, kpa* | 5.6 (1.6) 6.7 (3.2) | 0.0007 |
| LFC, %* | 5.85 (4.3) 15.72 (10.65) Biopsy Results | < 0.0001 |
| steatosis* | 1 (0) 2 (2) | < 0.0001 |
| inflammation* | 0 (1) 2 (1) | < 0.0001 |
| balloon* | 0 (1) 1 (0) | < 0.0001 |
| NAS* | 2 (2) 5 (1) | < 0.0001 |
| fibrosis* | 0 (0) 1 (1) | < 0.0001 |

Note: continuous data were described as median(IQR) and compared using Wilcox method, categorical variables were presented as proportions and compared using χ2 analysis.

1 Supplementary table 2 Baseline Characteristics by Metabolic Syndrome Status

| Variables | Non-Mets(n = 433) | Mets(n = 291) | p.value |
| --- | --- | --- | --- |
| Age, year* | 39 (14) | 42 (20) | 0.0019 |
| Male, N(%) | 298 (69%) | 197 (68%) | 0.8122 |
| BMI, kg/m2* | 27.4 (4.5) | 29 (4.35) | < 0.0001 |
| Weight, kg* | 76.4 (15.9) | 81.4 (16.1) | < 0.0001 |
| BMI categories - Lean*, N(%) | 45 (10%) | 2 (1%) | < 0.0001 |
| - Overweight, N(%) | 218 (50%) | 110 (38%) |  |
| - Obese, N(%) | 170 (39%) | 179 (62%) |  |
| Diabetes, N(%)* | 43 (10%) | 123 (42%) | < 0.0001 |
| AC,cm* | 94.8 (11.4) | 97.2 (10.8) | < 0.0001 |
| WC,cm* | 97.2 (11) | 98.9 (11) | < 0.0001 |
| HC,cm* | 101.3 (8.8) | 103.6 (9.7) | < 0.0001 |
| SBP,mmHg* | 125 (14) | 140 (19.5) | < 0.0001 |
| DBP,mmHg* | 80 (11)  Hematology Test Results | 91 (13.5) | < 0.0001 |
| ALT, U/L* | 29.2 (16.3) | 34 (18.3) | 0.0003 |
| AST, U/L* | 41.4 (37.5) | 49.3 (42.7) | 0.0118 |
| GGT, U/L* | 42.5 (34) | 51 (45.7) | < 0.0001 |
| TB, umol/L* | 14.1 (6.3) | 15 (6.4) | 0.0268 |
| TBA, umol/L* | 2.6 (2.3) | 2.7 (2.6) | 0.0227 |
| UA,umol/L* | 410 (138) | 428 (133) | 0.003 |
| TG, mmol/L* | 5.1 (1.31) | 5.33 (1.34) | 0.0008 |
| TC, mmol/L* | 1.69 (1.32) | 2.67 (1.83) | < 0.0001 |
| HDL, mmol/L | 1.12 (0.26) | 1.09 (0.36) | 0.1091 |
| LDL, mmol/L | 3.26 (1.19) | 3.26 (1.17) | 0.6309 |
| Glucose,mmol/L* | 5.4 (0.72) | 6.2 (1.82) | < 0.0001 |
| Ferritin,ug/L* | 201 (205.9) | 250.9 (249.95) | 0.002 |
| Insulin,pmol/L* | 111.2 (72.11) | 136.1 (109.11) | < 0.0001 |
| HOMA-IR* | 3.87 (2.81) Imaging Results | 5.46 (4.43) | < 0.0001 |
| CAP, db/m* | 292 (64) | 314 (70.5) | < 0.0001 |
| LSM, kpa* | 5.4 (2.2) | 6.4 (2.65) | < 0.0001 |
| LFC, %* | 9.47 (9.65) | 12.22 (9.85) | < 0.0001 |
| Steatotic degree -Health*, N(%) | 88 (20%) | 34 (12%) | 0.0021 |
| - Mild steatosis, N(%) | 218 (50%) | 141 (48%) |  |
| '- Moderate steatosis, N(%) | 113 (26%) | 98 (34%) |  |
| - Severe steatosis, N(%) | 14 (3%) | 18 (6%) |  |

2 Note: continuous data were described as median(IQR) and compared using Wilcox method, categorical

3 variables were presented as proportions and compared using χ2 analysis.

1

2 Supplementary table 3 Multivariate Linear Regression Analysis of Metabolic

3 Syndrome's Impact on Liver Fat in Different BMI Groups.

| **All participents(N=724)** | **coefficient** | **std.error** | **t.value** | **p.value** |
| --- | --- | --- | --- | --- |
| (Intercept) | 9.414 | 2.855 | 3.297 | 0.001 |
| Mets* | 2.147 | 0.566 | 3.791 | <0.001 |
| sex* | -3.189 | 0.769 | -4.146 | <0.001 |
| age* | -0.162 | 0.028 | -5.756 | <0.001 |
| weight | 0.05 | 0.041 | 1.214 | 0.225 |
| BMI | 0.244 | 0.146 | 1.664 | 0.097 |
| **Obese(N=349)** | **coefficient** | **std.error** | **t.value** | **p.value** |
| (Intercept) | 13.375 | 5.467 | 2.447 | 0.015 |
| Mets* | 1.932 | 0.803 | 2.407 | 0.017 |
| sex | -2.239 | 1.156 | -1.937 | 0.054 |
| age* | -0.18 | 0.04 | -4.521 | <0.001 |
| weight | 0.022 | 0.06 | 0.376 | 0.707 |
| BMI | 0.206 | 0.259 | 0.794 | 0.428 |
| **Overweight(N=328)** | **coefficient** | **std.error** | **t.value** | **p.value** |
| (Intercept) | 11.64 | 9.65 | 1.206 | 0.229 |
| Mets* | 2.474 | 0.855 | 2.895 | 0.004 |
| sex* | -3.979 | 1.17 | -3.402 | <0.001 |
| age* | -0.16 | 0.043 | -3.696 | <0.001 |
| weight | 0.108 | 0.067 | 1.619 | 0.106 |
| BMI | 0.001 | 0.386 | 0.003 | 0.998 |

4

5 Supplementary Table 4 Weight Change Groups : Baseline Values and Changes in

6 Indicators

| Variables | weight reduced >5% (n =  100) | weight witout great change (n  = 542) | weight increased >5% (n  = 82) | p.value |
| --- | --- | --- | --- | --- |

|  |  | Baseline Characterics |  |  |
| --- | --- | --- | --- | --- |
| Age,year | 39.5 (19.25) | 41 (15) | 37.5 (14.75) | 0.0911 |
| Male, N(%) | 73 (73%) | 372 (69%) | 50 (61%) | 0.2142 |
| Weight, kg | 85.2 (16.9) | 78.05 (15.9) | 73.9 (10.83) | <  0.0001 |
| BMI, kg/m2 | 28.9 (4.15) | 27.8 (4.2) | 27.95 (4.32) | 0.0009 |
| BMI categories - Lean,  N(%) | 3 (3%) | 38 (7%) | 6 (7%) | 0.1111 |

- Overweight, N(%) 37 (37%) 251 (46%) 40 (49%)

| - Obese, N(%) | 60 (60%) | 253 (47%) | 36 (44%) |  |
| --- | --- | --- | --- | --- |
| Mets, N(%)* | 42 (42%) | 220 (41%) | 29 (35%) | 0.6168 |
| Diabetes, N(%)* | 30 (30%) | 122 (23%) | 14 (17%) | 0.1067 |
| Steatotic degree -Health,  N(%)* | 13 (13%) | 89 (16%) | 20 (24%) | 0.2166 |
| - Mild steatosis, N(%) | 46 (46%) | 279 (51%) | 34 (41%) |  |
| '- Moderate steatosis,  N(%) | 34 (34%) | 152 (28%) | 25 (30%) |  |
| - Severe steatosis, N(%) | 7 (7%) | 22 (4%) Changes From Baseline | 3 (4%) |  |
| dWeight, kg* | -8.03 (6.29) | 0.43 (3.48) | 9.16 (11.38) | <  0.0001 |
| dBMI,kg/m2* | -1.7 (2.22) | 0 (1.07) | 1.2 (1.75) | <  0.0001 |
| dAC,cm* | -5.4 (7.32) | -1.75 (6.4) | 0.7 (8.55) | <  0.0001 |
| dWC,cm* | -1.6 (9.65) | -0.6 (7.12) | 2.75 (10.38) | <  0.0001 |
| dHC,cm* | -4.3 (9.18) | -0.55 (6.3) | 1 (6.15) | <  0.0001 |
| dSBP,mmHg* | -6.5 (20) | 0 (16) | 2 (19.75) | <  0.0001 |
| dDBP,mmHg* | -3 (13) | -2 (13) | 1.5 (12.75) | 0.0006 |
| dAST, U/L* | -7.8 (17.5) | -0.95 (12.77) | 0.9 (12) | <  0.0001 |
| dALT, U/L* | -17.7 (34.7) | -2.75 (25.7) | 4.45 (33.33) | <  0.0001 |
| dGGT, U/L* | -9.35 (19.27) | -1 (16.77) | 4.05 (16.58) | <  0.0001 |
| dTBA, umol/L* | 0.1 (2.34) | 0.15 (2.3) | 0.75 (2.78) | 0.0029 |
| dUA,umol/L* | -13 (89.5) | -4 (96.75) | 21 (85.5) | 0.0223 |
| dTC, mmol/L* | -0.16 (1.08) | 0.06 (0.96) | 0.22 (1.14) | 0.0035 |
| dTG, mmol/L* | -0.34 (1.09) | -0.12 (1.26) | 0.15 (1.14) | 0.0024 |
| dHDL, mmol/L | 0.01 (0.26) | 0.02 (0.24) | 0.02 (0.32) | 0.5215 |
| dLDL, mmol/L | -0.07 (0.86) | 0.06 (0.84) | 0.11 (0.84) | 0.1591 |
| dGlucose,mmol/L* | -0.32 (0.73) | -0.04 (0.9) | -0.1 (0.92) | 0.0047 |
| dFerritin,ug/L | -2.05 (99.77) | 2.1 (74.8) | 3.3 (86.57) | 0.5759 |
| dInsulin,pmol/L* | -11.04 (75.45) | 5.3 (67.64) | 23.02 (74.72) | 0.0003 |
| dHOMA-IR* | -0.67 (3.64) | 0.27 (2.79) | 0.9 (3.3) | 0.0003 |
| dCAP, db/m* | -20 (62.25) | -1 (50) | 24 (50) | <  0.0001 |
| dLSM, kpa* | -0.7 (2) | -0.1 (2) | 0.4 (1.9) | <  0.0001 |

1 Note: continuous data were described as median(IQR) and compared using Wilcox method, categorical

2 variables were presented as proportions and compared using χ2 analysis.

3 **References** 4

5 1 Wong VW, Adams LA, de Ledinghen V, et al. Noninvasive biomarkers in NAFLD and NASH -

6 current progress and future promise. *Nat Rev Gastroenterol Hepatol* 2018;15:461–78.

7 2 Kang GH, Cruite I, Shiehmorteza M, et al. Reproducibility of MRI-determined proton density fat

8 fraction across two different MR scanner platforms. *J Magn Reson Imaging* 2011;34:928–34.

9 3 Kuhn JP, Meffert P, Heske C, et al. Prevalence of fatty liver disease and hepatic iron overload in

10 a northeastern German population by using quantitative MR imaging. *Radiology*

11 2017;284:706–16.

12 4 Pavlou M, Ambler G, Seaman SR, et al. How to develop a more accurate risk prediction model

13 when there are few events. *BMJ* 2015;351:h3868.

14 5 Garcia-Carretero R, Vigil-Medina L, Barquero-Perez O, et al. Logistic LASSO and elastic net to

15 characterize vitamin D deficiency in a hypertensive obese population. *Metab Syndr Relat Disord*

16 2020;18:79-85.

17 6 McEligot AJ, Poynor V, Sharma R, et al. Logistic LASSO regression for dietary intakes and breast

18 cancer. *Nutrients* 2020;12:2652.

19

STROBE Statement—Checklist of items that should be included in reports of ***cohort studies***

**Item**

**Page**

**No Recommendation**

| **Title and abstract** | 1 | (*a*) Indicate the study’s design with a commonly used term in the title or the abstract | 1,3 |
| --- | --- | --- | --- |
| (*b*) Provide in the abstract an informative and balanced summary of what was 1 done and what was found | |
| **Introduction** | | | |
| Background/rationale | 2 | Explain the scientific background and rationale for the investigation being 4 reported | |
| Objectives | 3 | State specific objectives, including any prespecified hypotheses 5 | |
| **Methods** | | | |
| Study design | 4 | Present key elements of study design early in the paper 5 | |
| Setting | 5 | Describe the setting, locations, and relevant dates, including periods of 5  recruitment, exposure, follow-up, and data collection | |
| Participants | 6 | (*a*) Give the eligibility criteria, and the sources and methods of selection of 6 participants. Describe methods of follow-up | |
| (*b*) For matched studies, give matching criteria and number of exposed and 6 unexposed | |
| Variables | 7 | Clearly define all outcomes, exposures, predictors, potential confounders, 6  and effect modifiers. Give diagnostic criteria, if applicable | |
| Data sources/ | 8* | For each variable of interest, give sources of data and details of methods of *6* | |
| measurement |  | assessment (measurement). Describe comparability of assessment methods if there is more than one group | |
| Bias | 9 | Describe any efforts to address potential sources of bias 6 | |
| Study size | 10 | Explain how the study size was arrived at 5 | |
| Quantitative variables | 11 | Explain how quantitative variables were handled in the analyses. If 6  applicable, describe which groupings were chosen and why | |
| Statistical methods | 12 | (*a*) Describe all statistical methods, including those used to control for 6 confounding | |
| (*b*) Describe any methods used to examine subgroups and interactions 6 | |
| (*c*) Explain how missing data were addressed 6 | |
| (*d*) If applicable, explain how loss to follow-up was addressed 6 | |
| (*e*) Describe any sensitivity analyses 6 | |
| **Results** | | | |
| Participants | 13* | (a) Report numbers of individuals at each stage of study—eg numbers  potentially eligible, examined for eligibility, confirmed eligible, included in the study, completing follow-up, and analysed | 7 |
| (b) Give reasons for non-participation at each stage 7 | |
| (c) Consider use of a flow diagram 7 | |
| Descriptive data | 14* | (a) Give characteristics of study participants (eg demographic, clinical, 7  social) and information on exposures and potential confounders | |
| (b) Indicate number of participants with missing data for each variable of 7 interest | |
| (c) Summarise follow-up time (eg, average and total amount) 7 | |
| Outcome data | 15* | Report numbers of outcome events or summary measures over time 9 | |
| Main results | 16 | (*a*) Give unadjusted estimates and, if applicable, confounder-adjusted 9  estimates and their precision (eg, 95% confidence interval). Make clear | |

|  |  | which confounders were adjusted for and why they were included |  |
| --- | --- | --- | --- |
| (*b*) Report category boundaries when continuous variables were categorized | 9 |
| (*c*) If relevant, consider translating estimates of relative risk into absolute risk for a meaningful time period | 9 |
| Other analyses | 17 | Report other analyses done—eg analyses of subgroups and interactions, and sensitivity analyses | 9 |
| **Discussion** | | | |
| Key results | 18 | Summarise key results with reference to study objectives | 12 |
| Limitations | 19 | Discuss limitations of the study, taking into account sources of potential bias or imprecision. Discuss both direction and magnitude of any potential bias | 14 |
| Interpretation | 20 | Give a cautious overall interpretation of results considering objectives,  limitations, multiplicity of analyses, results from similar studies, and other relevant evidence | 13 |
| Generalisability | 21 | Discuss the generalisability (external validity) of the study results | 13 |
| **Other information** | | | |
| Funding | 22 | Give the source of funding and the role of the funders for the present study and, if applicable, for the original study on which the present article is based | 2 |

*Give information separately for exposed and unexposed groups.

**Note:** An Explanation and Elaboration article discusses each checklist item and gives methodological background and published examples of transparent reporting. The STROBE checklist is best used in conjunction with this article (freely available on the Web sites of PLoS Medicine at <http://www.plosmedicine.org/>, Annals of Internal Medicine at

<http://www.annals.org/>, and Epidemiology at <http://www.epidem.com/>). Information on the STROBE Initiative is available at <http://www.strobe-statement.org>.
